# Supplementary material
Source: PubMed Central journal article supplement (PMC6417984)
Supplement: NIHMS1507900-supplement-Figure_S1.pdf [file NIHMS1507900-supplement-Figure_S1.pdf]

**Figure S1.** Study timeline for infantile Pompe disease patients receiving weekly ERT infusions.

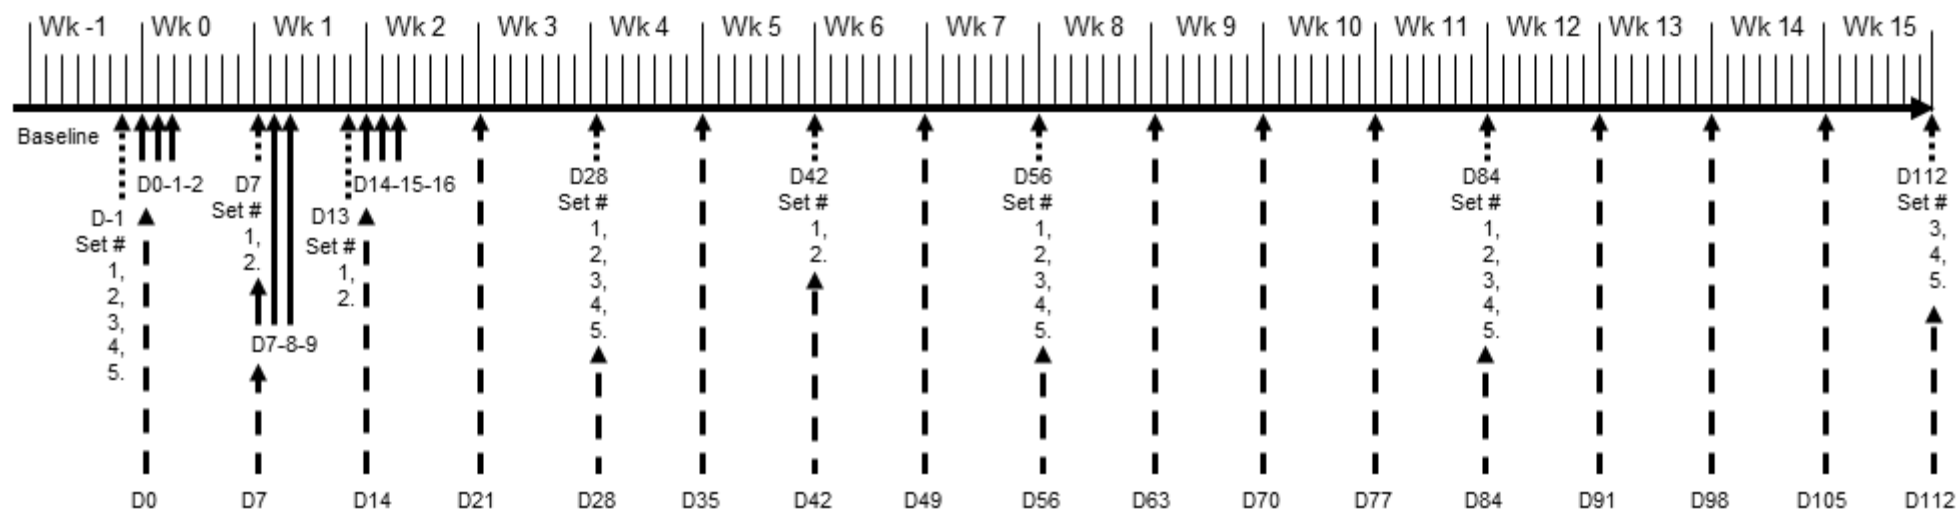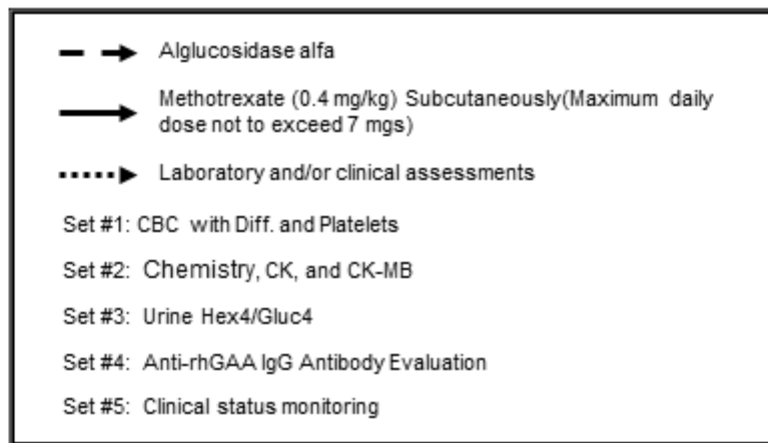

D, day, Wk, week, mg, milligram, kg, kilogram, CBC with diff., complete blood count with differential, CK, creatinine kinase, Hex<sub>4</sub>/Glc<sub>4</sub>, glucose tetrasaccharide, rhGAA, recombinant human acid alpha glucosidase, IgG, immunoglobulin G.
