# Supplementary material
Source: PubMed Central journal article supplement (PMC6417984)
Supplement: NIHMS1507900-supplement-Figure_S3.pdf [file NIHMS1507900-supplement-Figure_S3.pdf]

**Figure S3.** Comparison of GAA variants in IOPD patients treated with TLD-MTX with CRIM-positive IOPD patients treated with ERT monotherapy.

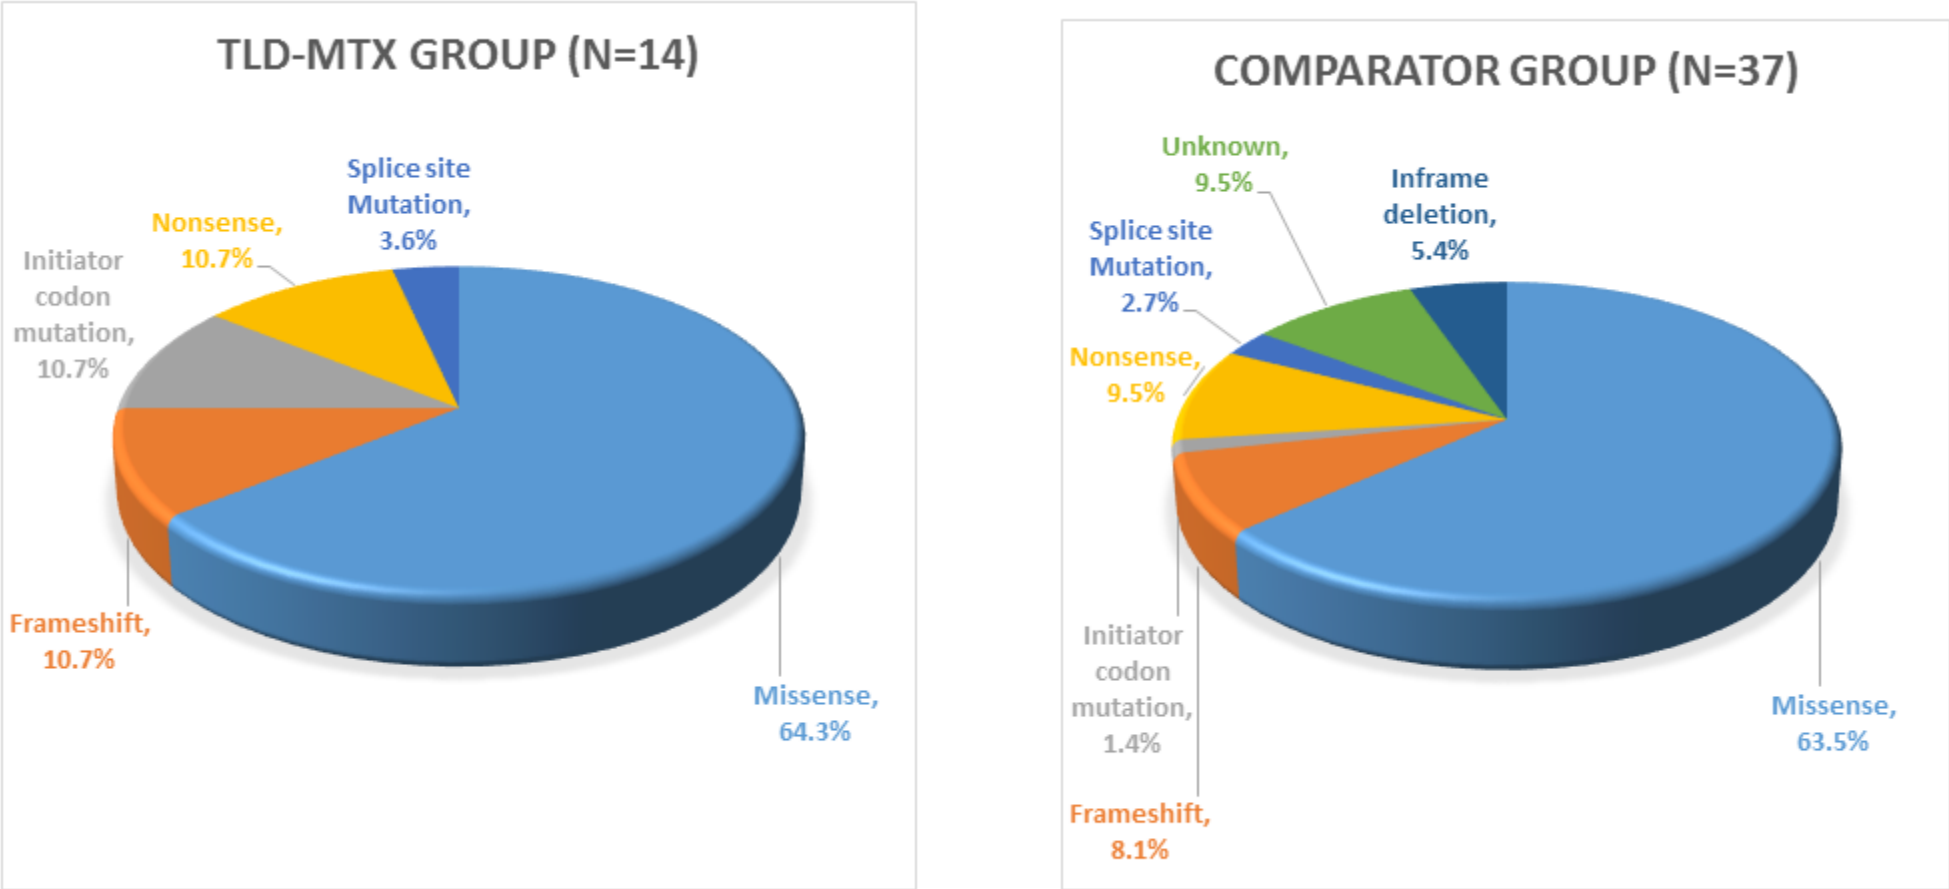

GAA, acid alpha glucosidase, IOPD, infantile-onset Pompe disease, TLD-MTX, transient low-dose methotrexate, CRIM, cross-reactive immunological material, ERT, enzyme replacement therapy.
